# Supplementary material
Source: MDPI journal article supplement (https://www.mdpi.com/2073-4441/14/19/3191)
Supplement: s1 [file s1]

# **Ecological health status of the Yitong River, China, assessed with the Planktonic Index of Biotic Integrity**

Ke Zhao, Ang Dong, Shuwei Wang, Xiangfei Yu \*

Key Laboratory of Songliao Aquatic Environment, Ministry of Education, Jilin Jianzhu  
University, 5088 Xincheng Street, Changchun, 130118, China

**\*Corresponding author:** Dr. Xiangfei Yu

**Email:** yuxiangfei@jlju.edu.cn; **Tel.:** 86-431-84566407

**Address:** Key Laboratory of Songliao Aquatic Environment, Ministry of Education,  
Jilin Jianzhu University, 5088 Xincheng Street, Changchun, 130118, China

**Table S1.** Candidate metrics for the phytoplankton index of biotic integrity (Phyto-IBI).

| Level           | Candidate metric and abbreviation                                   | Formula                                                                                               | Reference |
|-----------------|---------------------------------------------------------------------|-------------------------------------------------------------------------------------------------------|-----------|
| Biomass         | <b>P1</b> Phytoplankton biomass (–)                                 |                                                                                                       | [1]       |
| Abundance       | <b>P2</b> Phytoplankton abundance (–)                               |                                                                                                       | [1]       |
|                 | <b>P3</b> Cyanophyta abundance (–)                                  |                                                                                                       | [1]       |
|                 | <b>P4</b> Chlorophyta abundance (–)                                 |                                                                                                       | [1]       |
|                 | <b>P5</b> Bacillariophyta abundance (–)                             |                                                                                                       | [2]       |
|                 | <b>P6</b> % cyanophyta abundance (–)                                |                                                                                                       | [1]       |
|                 | <b>P7</b> % chlorophyta abundance (–)                               |                                                                                                       | [1]       |
|                 | <b>P8</b> % bacillariophyta abundance (+)                           |                                                                                                       | [2]       |
|                 | <b>P9</b> % navicula abundance (+)                                  |                                                                                                       | [1]       |
|                 | <b>P10</b> % cymbella abundance (+)                                 |                                                                                                       | [1]       |
|                 | <b>P11</b> % dominant species abundance (–)                         |                                                                                                       | [1]       |
|                 | <b>P12</b> % total abundance of cyanophyta and chlorophyta (–)      |                                                                                                       | [1]       |
|                 | <b>P13</b> % total abundance of chlorophyta and bacillariophyta (+) |                                                                                                       | [2]       |
| Diversity index | <b>P14</b> Phytoplankton species number (–)                         |                                                                                                       | [1]       |
|                 | <b>P15</b> Margalef richness index (–)                              | $d_M = (S - 1) / \ln N$                                                                               | [1,3]     |
|                 | <b>P16</b> Pielou evenness index (+)                                | $J = H' / \ln S$                                                                                      | [1,4]     |
|                 | <b>P17</b> Simpson diversity index (–)                              | $D = 1 - \text{Sum} ((N_i * (N_i - 1)) / (N * (N - 1)))$                                              | [1,5]     |
|                 | <b>P18</b> Shannon–Wiener diversity index (+)                       | $H' = - \sum (n_i/N) * \ln(n_i/N)$                                                                    | [1,6]     |
| Trophic status  | <b>P19</b> Trophic diatom index (+)                                 | $TDI = \sum (a_j v_{ij}) / \sum (a_j v_j)$                                                            | [1,7]     |
|                 | <b>P20</b> Diatom quotient (–)                                      | Centrales abundance/pennales abundance                                                                | [1,8]     |
|                 | <b>P21</b> Palmer algal genus pollution index (+)                   | Sum of biological pollution index values                                                              | [1,9]     |
|                 | <b>P22</b> Generic diatom index (–)                                 | Abundances of (achnanthes + cocconeis + cyclotella) / abundances of (cymbella + melosira + nitzschia) | [1,10]    |

Note: + indicates a positive response to environmental factors; – indicates a negative response.

**Table S2.** Candidate metrics for the zooplankton index of biotic integrity (Z-IBI).

| Level           | Candidate metric and abbreviation                         | Formula                                                                                                    | Reference        |
|-----------------|-----------------------------------------------------------|------------------------------------------------------------------------------------------------------------|------------------|
| Biomass         | <b>Z1</b> Zooplankton biomass (–)                         |                                                                                                            | [1]              |
|                 | <b>Z2</b> Zooplankton biomass/phytoplankton biomass (–)   |                                                                                                            | [1]              |
| Abundance       | <b>Z3</b> Zooplankton abundance (–)                       |                                                                                                            | [1]              |
|                 | <b>Z4</b> Rotifer abundance (–)                           |                                                                                                            | [1]              |
|                 | <b>Z5</b> Protozoa abundance (–)                          |                                                                                                            | Current research |
|                 | <b>Z6</b> Cladocera abundance (+)                         |                                                                                                            | [1]              |
|                 | <b>Z7</b> Copepod abundance (–)                           |                                                                                                            | [1]              |
|                 | <b>Z8</b> Copepod nauplii abundance (–)                   |                                                                                                            | [1]              |
|                 | <b>Z9</b> % rotifer abundance (–)                         |                                                                                                            | [1]              |
|                 | <b>Z10</b> % protozoa abundance (+)                       |                                                                                                            | Current research |
|                 | <b>Z11</b> % total abundance of cladocera and copepod (–) |                                                                                                            | [1]              |
|                 | <b>Z12</b> % dominate species abundance (–)               |                                                                                                            | [1]              |
| Diversity index | <b>Z13</b> Zooplankton species number (–)                 |                                                                                                            | [1]              |
|                 | <b>Z14</b> Rotifer species (–)                            |                                                                                                            | [1]              |
|                 | <b>Z15</b> Margalef richness index (–)                    | $d_M = (S-1) / \ln N$                                                                                      | [1,3]            |
|                 | <b>Z16</b> Pielou evenness index (–)                      | $J = H' / \ln S$                                                                                           | [1,4]            |
|                 | <b>Z17</b> Simpson diversity index (+)                    | $D = 1 - \text{Sum} ((N_i * (N_i - 1)) / (N * (N - 1)))$                                                   | [1,5]            |
|                 | <b>Z18</b> Shannon–Wiener diversity index (–)             | $H' = -\sum (n_i/N) * \ln(n_i/N)$                                                                          | [1,6]            |
| Trophic status  | <b>Z19</b> B/T (–)                                        | B/T = Brachionus abundance / Trichocera abundance                                                          | [1,11]           |
|                 | <b>Z20</b> E/O index (+)                                  | E/O = Eutrophic–mesotrophic indicators species number / Oligotrophic–mesotrophic indicators species number | [1,12]           |
|                 |                                                           |                                                                                                            |                  |
|                 | <b>Z21</b> Fertility of zooplankton (–)                   | $E' = (K(x+1)) / ((A+Y) (y+1))$                                                                            | [1,13]           |

Note: + indicates a positive response to environmental factors; – indicates a negative response.

**Table S3.** Weights and normalization factors of the parameters used in the WQL.

| Variables                       | Weight<br>(P <sub>i</sub> ) | Normalization factor (C <sub>i</sub> ) |        |        |       |        |       |        |        |        |       |        |
|---------------------------------|-----------------------------|----------------------------------------|--------|--------|-------|--------|-------|--------|--------|--------|-------|--------|
|                                 |                             | 100                                    | 90     | 80     | 70    | 60     | 50    | 40     | 30     | 20     | 10    | 0      |
| WT                              | 1                           | 21/16                                  | 22/15  | 24/14  | 26/12 | 28/10  | 30/5  | 32/0   | 36/-2  | 40/-4  | 45/-6 | >45/-6 |
| pH                              | 1                           | 7                                      | 7-8    | 7-8.5  | 7-9   | 6.5-7  | 6-9.5 | 5-10   | 4-11   | 3-12   | 2-13  | 1-14   |
| DO                              | 4                           | ≥7.5                                   | > 7    | > 6.5  | > 6   | > 5    | > 4   | > 3.5  | > 3    | > 2    | ≥1    | < 1    |
| TN                              | 2                           | < 0.1                                  | < 0.2  | < 0.35 | < 0.5 | < 0.75 | < 1   | < 1.25 | < 1.5  | < 1.75 | ≤2    | > 2    |
| NH <sub>4</sub> <sup>+</sup> -N | 3                           | < 0.01                                 | < 0.05 | < 0.1  | < 0.2 | < 0.3  | < 0.4 | < 0.5  | < 0.75 | < 1    | ≤1.25 | > 1.25 |
| NO <sub>3</sub> <sup>-</sup> -N | 2                           | < 0.5                                  | < 2    | < 4    | < 6   | < 8    | < 10  | < 15   | < 20   | < 50   | ≤100  | > 100  |
| TP                              | 1                           | < 0.01                                 | < 0.02 | < 0.05 | < 0.1 | < 0.15 | < 0.2 | < 0.25 | < 0.3  | < 0.35 | ≤0.4  | > 0.4  |
| COD <sub>Cr</sub>               | 3                           | <5                                     | <10    | <20    | <30   | <40    | <50   | <60    | <80    | <100   | ≤150  | > 150  |
| COD <sub>Mn</sub>               | 3                           | <1                                     | <2     | <3     | <4    | <5     | <8    | <10    | <12    | <14    | ≤15   | > 15   |

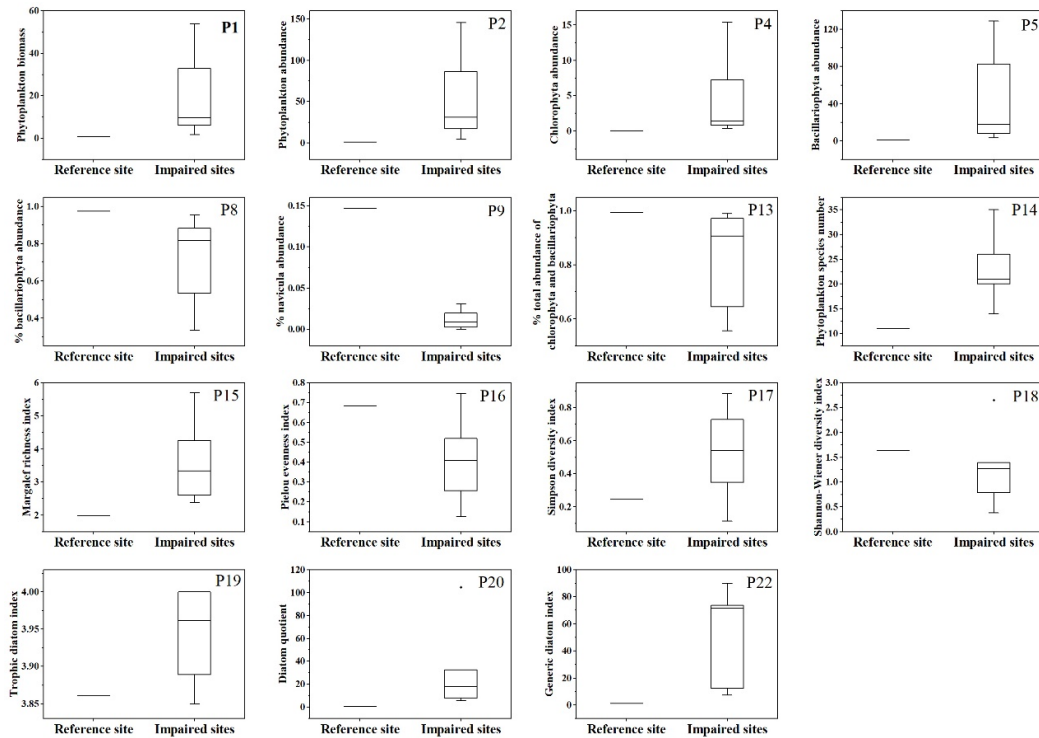**Figure S1.** Boxplots of 15 candidate metrics between the reference site and impaired sites in spring.

**Table S4.** Correlation analysis among 15 candidate metrics in spring

|     | P1             | P2             | P4    | P5     | P8             | P9     | P13    | P14            | P15    | P16             | P17             | P18            | P19   | P20   | P22 |
|-----|----------------|----------------|-------|--------|----------------|--------|--------|----------------|--------|-----------------|-----------------|----------------|-------|-------|-----|
| P1  | 1              |                |       |        |                |        |        |                |        |                 |                 |                |       |       |     |
| P2  | <b>0.997**</b> | 1              |       |        |                |        |        |                |        |                 |                 |                |       |       |     |
| P4  | 0.746          | <b>0.767*</b>  | 1     |        |                |        |        |                |        |                 |                 |                |       |       |     |
| P5  | <b>0.997**</b> | <b>0.990**</b> | 0.717 | 1      |                |        |        |                |        |                 |                 |                |       |       |     |
| P8  | 0.307          | 0.242          | −0.11 | 0.367  | 1              |        |        |                |        |                 |                 |                |       |       |     |
|     |                |                | 9     |        |                |        |        |                |        |                 |                 |                |       |       |     |
| P9  | −0.437         | −0.454         | −0.26 | −0.412 | 0.285          | 1      |        |                |        |                 |                 |                |       |       |     |
|     |                |                | 8     |        |                |        |        |                |        |                 |                 |                |       |       |     |
| P13 | 0.339          | 0.274          | 0.105 | 0.400  | <b>0.916**</b> | 0.302  | 1      |                |        |                 |                 |                |       |       |     |
| P14 | −0.050         | −0.025         | 0.346 | −0.063 | −0.584         | −0.395 | −0.263 | 1              |        |                 |                 |                |       |       |     |
| P15 | −0.226         | −0.198         | 0.273 | −0.245 | −0.659         | −0.292 | −0.343 | <b>0.973**</b> | 1      |                 |                 |                |       |       |     |
| P16 | −0.711         | −0.675         | −0.17 | −0.742 | −0.586         | 0.582  | −0.506 | 0.146          | 0.328  | 1               |                 |                |       |       |     |
|     |                |                | 0     |        |                |        |        |                |        |                 |                 |                |       |       |     |
| P17 | 0.708          | 0.666          | 0.172 | 0.744  | 0.658          | −0.503 | 0.596  | −0.175         | −0.355 | <b>−0.993**</b> | 1               |                |       |       |     |
| P18 | −0.639         | −0.596         | −0.02 | −0.674 | <b>−0.754*</b> | 0.344  | −0.576 | 0.485          | 0.636  | <b>0.935**</b>  | <b>−0.942**</b> | 1              |       |       |     |
|     |                |                | 3     |        |                |        |        |                |        |                 |                 |                |       |       |     |
| P19 | 0.431          | 0.438          | 0.200 | 0.418  | 0.096          | −0.551 | −0.089 | −0.174         | −0.222 | −0.504          | 0.429           | −0.500         | 1     |       |     |
| P20 | 0.596          | 0.578          | 0.005 | 0.625  | 0.355          | −0.420 | 0.259  | −0.108         | −0.323 | <b>−0.783*</b>  | <b>0.771*</b>   | −0.724         | 0.168 | 1     |     |
| P22 | 0.730          | 0.704          | 0.261 | 0.743  | 0.440          | −0.651 | 0.484  | −0.177         | −0.343 | <b>−0.891*</b>  | <b>0.903*</b>   | <b>−0.818*</b> | 0.319 | 0.740 | 1   |

Note: \* indicates significant correlation at 0.05 level; \*\* indicates significant correlation at 0.01 level.

**Table S5.** Water quality parameters of Yitong River in different seasons.

| Parameters                             | Water quality parameters in different seasons |               |               |               |
|----------------------------------------|-----------------------------------------------|---------------|---------------|---------------|
|                                        | Spring                                        | Summer        | Autumn        | Winter        |
| TN (mg/L)                              | 3.25 ± 1.82                                   | 4.05 ± 2.10   | 3.78 ± 1.60   | 4.78 ± 2.40   |
| NH <sub>4</sub> <sup>+</sup> -N (mg/L) | 0.64 ± 0.32                                   | 0.71 ± 0.75   | 1.09 ± 1.65   | 0.26 ± 0.32   |
| NO <sub>3</sub> <sup>-</sup> -N (mg/L) | 1.63 ± 1.58                                   | 1.70 ± 1.33   | 2.05 ± 1.45   | 3.44 ± 2.21   |
| TP (mg/L)                              | 0.17 ± 0.09                                   | 0.31 ± 0.07   | 0.18 ± 0.13   | 0.12 ± 0.06   |
| COD <sub>Cr</sub> (mg/L)               | 24.62 ± 7.84                                  | 43.16 ± 17.25 | 27.41 ± 13.49 | 20.00 ± 8.17  |
| COD <sub>Mn</sub> (mg/L)               | 6.17 ± 1.41                                   | 6.30 ± 1.84   | 5.73 ± 1.43   | 4.84 ± 1.94   |
| WT (°C)                                | 10.71 ± 2.66                                  | 22.11 ± 2.34  | 13.91 ± 0.67  | 1.29 ± 0.88   |
| DO (mg/L)                              | 10.63 ± 1.75                                  | 7.18 ± 2.04   | 8.32 ± 1.48   | 10.18 ± 1.54  |
| pH                                     | 8.29 ± 0.52                                   | 7.81 ± 0.60   | 7.76 ± 0.32   | 7.94 ± 0.40   |
| SD (m)                                 | 54.31 ± 21.91                                 | 49.29 ± 12.78 | 44.43 ± 15.66 | 52.57 ± 19.73 |

## References

1. Wan, X.; Yang, T.; Zhang, Q.; Wang, W.; Wang, Y. Joint effects of habitat indexes and physic-chemical factors for freshwater basin of semi-arid area on plankton integrity—A case study of the Wei River Basin, China. *Ecol. Indic.* **2021**, *120*, 106909.
2. Zhang, Y.; Ban, X.; Li, E.; Wang, Z.; Xiao, F. Evaluating ecological health in the middle-lower reaches of the Hanjiang River with cascade reservoirs using the Planktonic index of biotic integrity (P-IBI). *Ecol. Indic.* **2020**, *114*, 106282.
3. Margalef, D.R. Information theory in ecology. *Memorias de la Real Academica de ciencias y artes de Barcelona* **1957**, *32*, 374–559.
4. Pielou, E.C. The measurement of diversity in different types of biological collections. *J. Theor. Biol.* **1966**, *13*, 131–144.
5. Ludwig, J.A.; Reynolds, J.F.; QUARTET, L.; Reynolds, J. *Statistical ecology: a primer in methods and computing*; John Wiley & Sons: New York, 1988.
6. Shannon, C.E. A mathematical theory of communication. *The Bell system technical journal* **1948**, *27*, 379–423.
7. Kelly, M.; Whitton, B.A. The trophic diatom index: a new index for monitoring eutrophication in rivers. *J. Appl. Phycol.* **1995**, *7*, 433–444.
8. Kane, D.D.; Gordon, S.I.; Munawar, M.; Charlton, M.N.; Culver, D.A. The Planktonic Index of Biotic Integrity (P-IBI): an approach for assessing lake ecosystem health. *Ecol. Indic.* **2009**, *9*, 1234–1247.
9. Palmer, C.M. A composite rating of algae tolerating organic pollution 2. *J. Phycol.* **1969**, *5*, 78–82.
10. Wu, J.-T. A generic index of diatom assemblages as bioindicator of pollution in the Keelung River of Taiwan. *Hydrobiologia* **1999**, *397*, 79–87.
11. Sládeček, V. Rotifers as indicators of water quality. *Hydrobiologia* **1983**, *100*, 169–201.
12. Ministry of Environmental Protection of the People's Republic of China. *Method of Water and Wastewater Monitoring*, 4th ed; China Environmental Science Press: Beijing, China, 2002.(in Chinese).
13. Wang, S.; Chen, H.; Liu, Q.; Xu, J.; Zhang, G.; Wang, Z. Zooplankton community structure and its correlation with water quality in Hancheng Lake. *Ecol. Sci.* **2018**, *37*, 114–123.(in Chinese).
